# Supplementary material for: Seed-induced acceleration of amyloid-β mediated neurotoxicity in vivo
Source: PubMed Central journal article supplement (PMC5594032; doi:10.1038/s41467-017-00579-4), 2017-09-11
Supplement: 41467_2017_579_MOESM1_ESM.pdf [file 41467_2017_579_MOESM1_ESM.pdf]

**Description of Supplementary Files**

File Name: Supplementary Information

Description: Supplementary figures

File Name: Peer Review File

# **Direct *in vivo* evidence for seed-induced acceleration of amyloid- $\beta$ neurotoxicity**

Ramona F. Sowade<sup>1</sup> & Thomas R. Jahn<sup>1,\*</sup>

<sup>1</sup>Schaller Research Group at the University of Heidelberg and DKFZ, Proteostasis in Neurodegenerative Disease (B180), German Cancer Research Center, 69120 Heidelberg, Germany.

\*Current address: AbbVie Deutschland GmbH & Co. KG, 67061 Ludwigshafen, Germany. Correspondence should be addressed to T.R.J. (email: [thomas.r.jahn@abbvie.com](mailto:thomas.r.jahn@abbvie.com)).

**Supplementary Information**

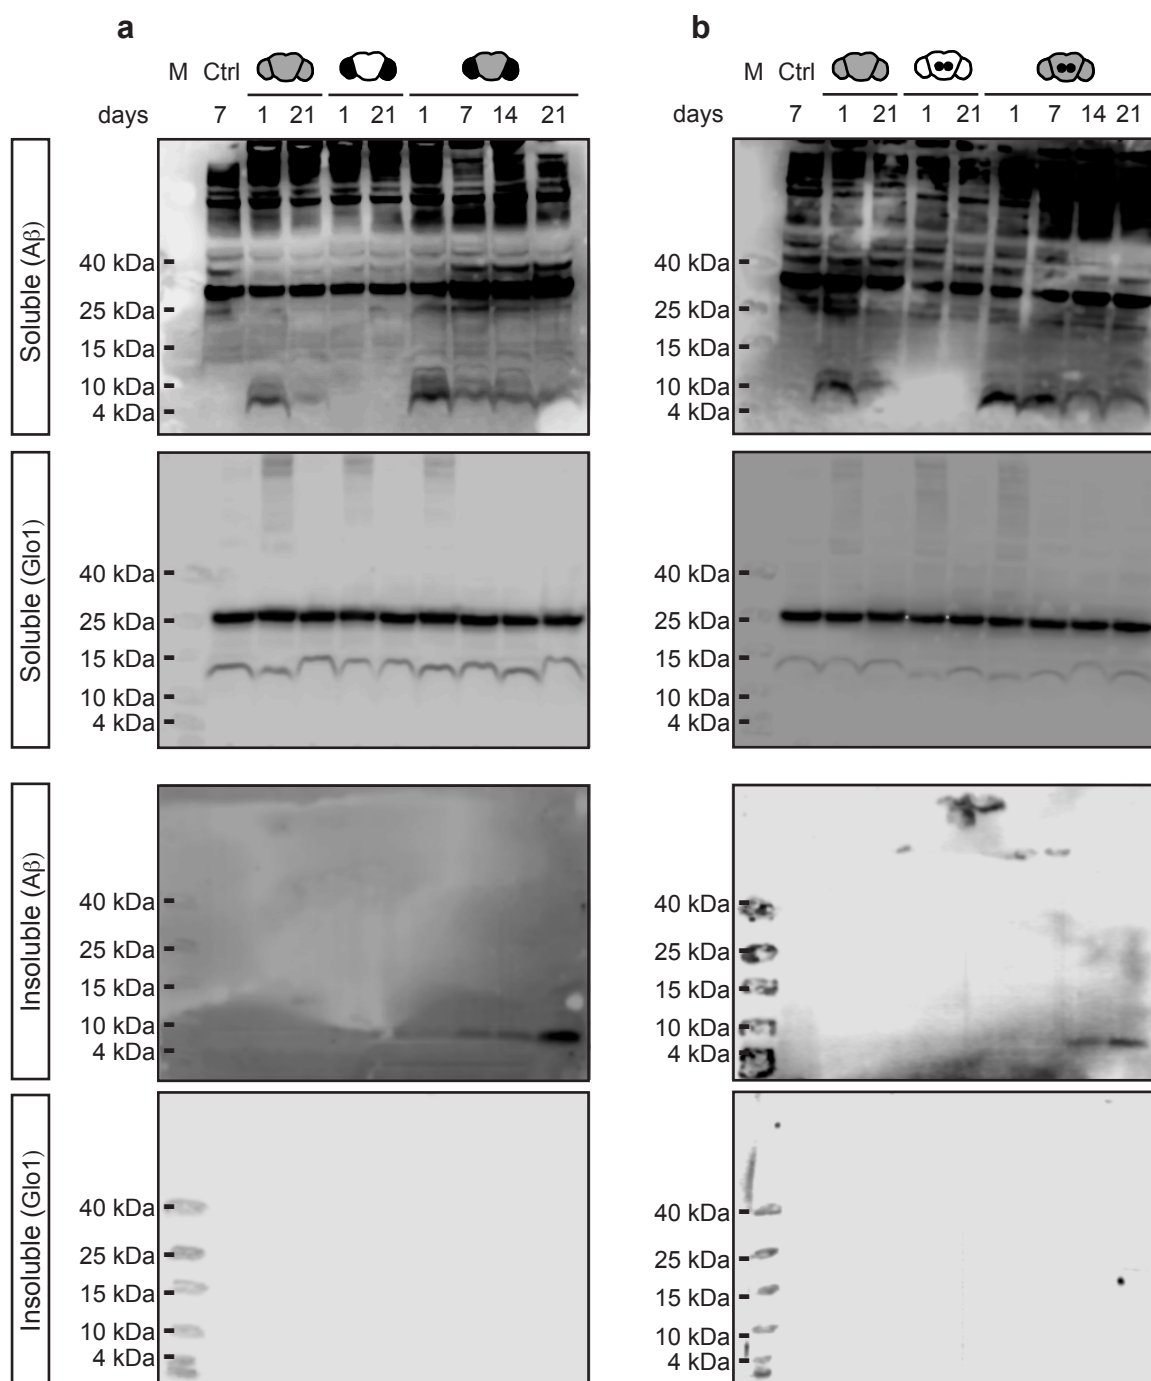

**Supplementary Figure 1 | Time-dependent seeding of amyloid deposition in *Drosophila* brains.** Exemplary western blot analysis of flies expressing either a single A $\beta$  variant or the combination of A $\beta$ <sub>40</sub> and A $\beta$ <sub>42</sub> arctic. The indicated time points (days post eclosion) were analysed. A $\beta$ <sub>42</sub> arctic seeds were either expressed in the optic lobes (**a**) or the central brain (**b**). Driver lines as indicated in Fig. 1. Total protein was extracted from the fly head and then separated into soluble and insoluble fraction. The blots were probed with the monoclonal A $\beta$  antibody 6E10 and with an antibody to detect Glyoxalase 1 (Glo1, loading control). The Spectra Multicolor Low Range Protein Ladder was used as size marker (M).

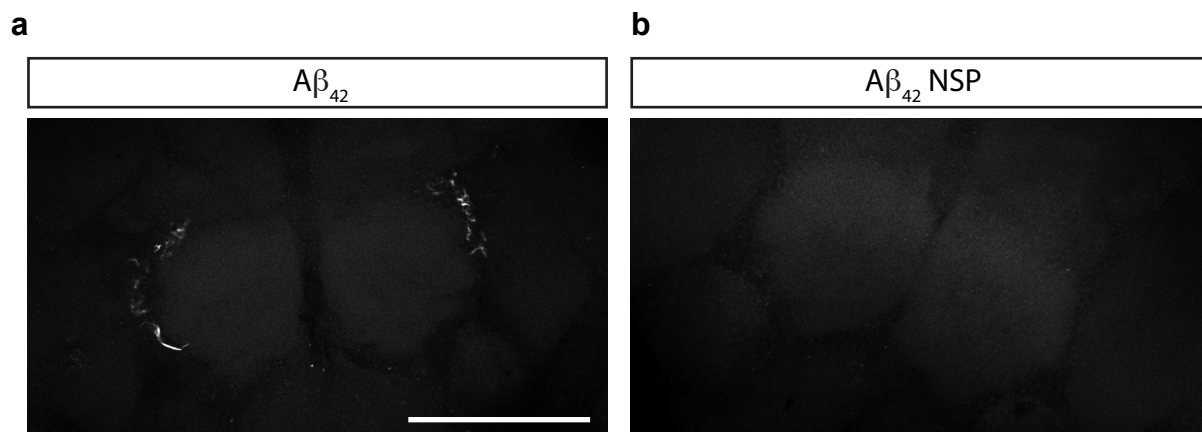

**Supplementary Figure 2 | A $\beta$  missing the secretion peptide does not accumulate in the brain.** Immunohistochemical analysis of fly brains expressing A $\beta_{42}$  either with (a) or without (b, NSP) the secretion peptide. Transgene expression was driven using the *GMR14B06*-Gal4 driver. The confocal images show a zoom of the antennal lobes. Fly brains were stained with 6E10 detecting total A $\beta$ . Only A $\beta$  carrying the secretion peptide can be detected in the target region (a), whereas no 6E10 staining can be observed for A $\beta_{42}$  NSP (b). Scale bar, 100  $\mu$ m.

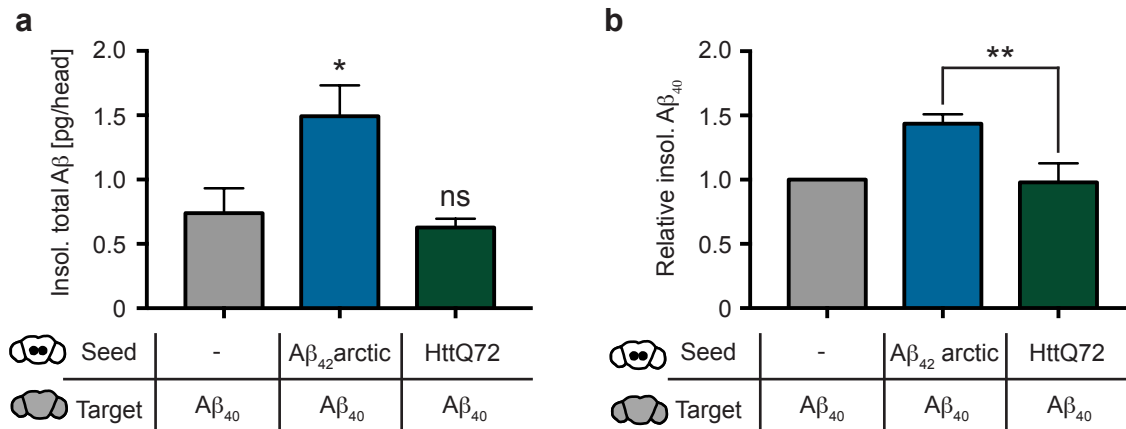

**Supplementary Figure 3 | Aggregation-prone A $\beta_{42}$  arctic but not Huntingtin seeds induce deposition of A $\beta_{40}$ .** Levels of insoluble A $\beta$  in 21-day-old flies with the indicated genotypes were assessed using ECL analysis. As seeds we either expressed A $\beta_{42}$  arctic or an aggregation prone Huntingtin variant with an expanded polyQ tract (HttQ72) in the central brain using *GMR14B06*-Gal4. **(a)** Level of insoluble total A $\beta$ , i.e. the sum of A $\beta_{40}$  and A $\beta_{42}$  (error bars, s.e.m., n=5 independent biological replicates, one-way ANOVA (Dunnett's multiple comparisons test) in comparison to A $\beta_{40}$  only (target) only, \*P=0.0239). **(b)** Relative level of insoluble A $\beta_{40}$  normalized to target only (error bars, s.e.m., n=4 independent biological replicates, one-way ANOVA (Dunnett's multiple comparisons test), \*\*P=0.0094).

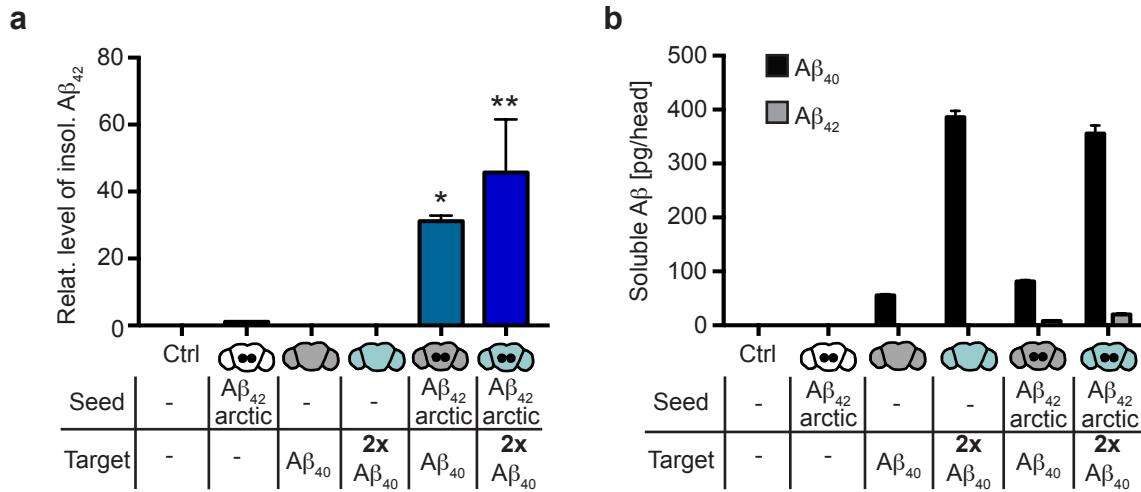

**Supplementary Figure 4 | Accumulation of  $A\beta_{42}$  in *Drosophila* seeding models.**

(a) ECL measurement of insoluble  $A\beta_{42}$  in flies aged 21 days. Levels were normalized to  $A\beta_{42}$  arctic only (error bars, s.e.m., n=3 independent biological replicates, one-way ANOVA (Dunnett's multiple comparisons test), \*P=0.0253, \*\*P=0.0016). (b) Levels of soluble  $A\beta_{40}$  (black) and  $A\beta_{42}$  (grey) were measured using ECL assays (error bars, s.e.m., n=3 independent biological replicates).
